# Supplementary material for: Rab27A Regulates Transport of Cell Surface Receptors Modulating Multinucleation and Lysosome-Related Organelles in Osteoclasts
Source: Sci Rep. 2015 Apr 16;5:9620. doi: 10.1038/srep09620 (PMC5381753; doi:10.1038/srep09620)
Supplement: Supplementary Information [file srep09620-s1.pdf]

## **Supplementary Information**

### **Rab27A Regulates Transport of Cell Surface Receptors Modulating Multinucleation and Lysosome-Related Organelles in Osteoclasts**

Megumi Shimada-Sugawara<sup>1,2</sup>, Eiko Sakai<sup>1</sup>, Kuniaki Okamoto<sup>1</sup>, Mitsunori Fukuda<sup>3</sup>,

Tetsuro Izumi<sup>4</sup>, Noriaki Yoshida<sup>2</sup>, and Takayuki Tsukuba<sup>1\*</sup>

From the <sup>1</sup>Division of Dental Pharmacology, <sup>2</sup>Division of Orthodontics and Dentofacial Orthopedics, Graduate School of Biomedical Sciences, Nagasaki University, Nagasaki 852-8588, Japan, <sup>3</sup>Laboratory of Membrane Trafficking Mechanisms, Department of Developmental Biology and Neurosciences, Graduate School of Life Sciences, Tohoku University, Aobayama, Aoba-ku, Sendai, Miyagi 980-8578, Japan; <sup>4</sup>Department of Molecular Medicine, Institute for Molecular and Cellular Regulation, Gunma University, Maebashi 371-8512, Japan.

# Contents

## Supplementary Figures

|                                                                                     |   |
|-------------------------------------------------------------------------------------|---|
| <b>Figure S1:</b> Up-regulation of Rab27A during osteoclastogenesis.....            | 3 |
| <b>Figure S2:</b> Subcellular localization of GFP-Rab27A expressed RAW-D cells..... | 4 |
| <b>Figure S3:</b> Original gel images of immunoblot analysis.....                   | 5 |
| <b>Figure S4:</b> Original gel images of immunoblot analysis.....                   | 6 |
| <b>Figure legends:</b> .....                                                        | 7 |

(a)

| Gene title                                      | Log ratio |
|-------------------------------------------------|-----------|
| calcitonin receptor                             | 3.84      |
| cathepsin K                                     | 3.29      |
| transmembrane 7 superfamily member 4 (DC-STAMP) | 3.14      |
| carbonic anhydrase 2                            | 3.47      |
| acid phosphatase 5, tartrate resistant (TRAP)   | 2.41      |
| Rab27A                                          | 1.26      |
| Rab27B                                          | -1.09     |

(b)

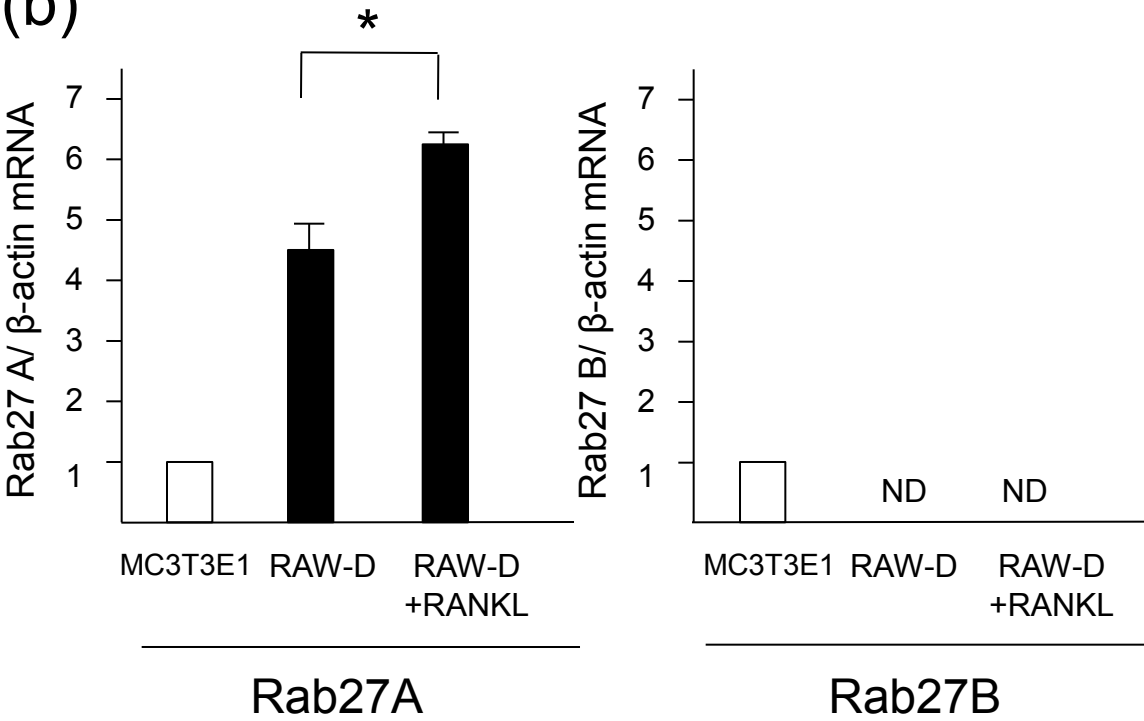

Supplementary Figure 1

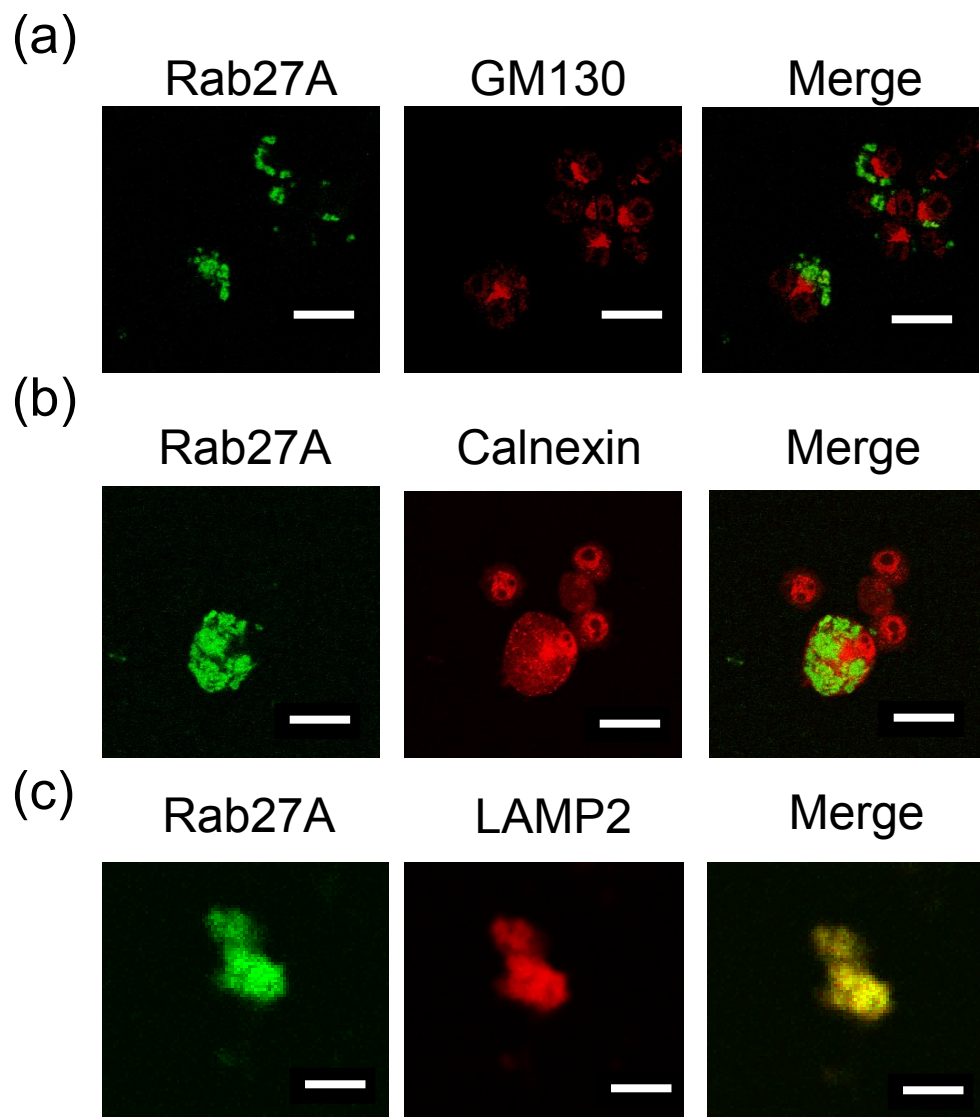

Supplementary Figure 2

Fig. 4(a)

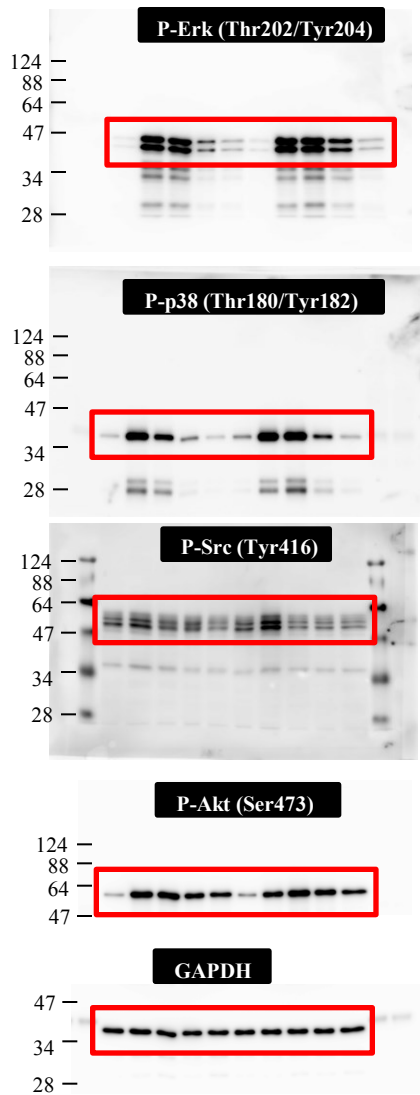

Fig. 4(b)

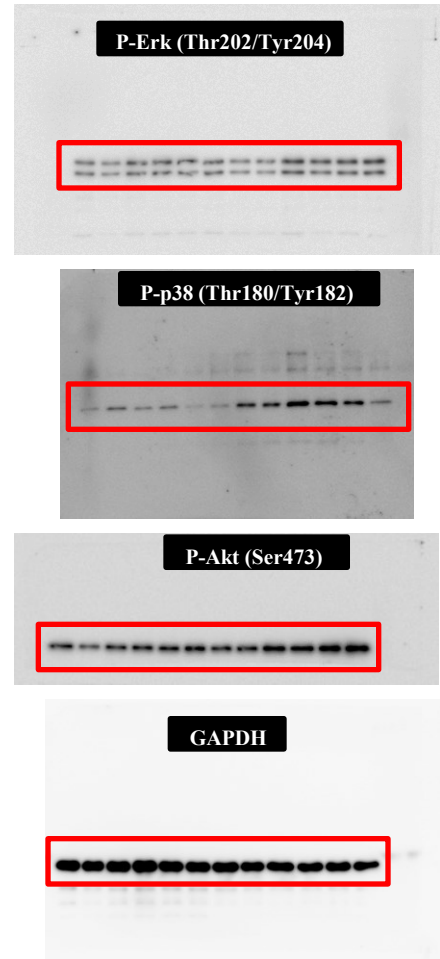

Fig. 5(g)

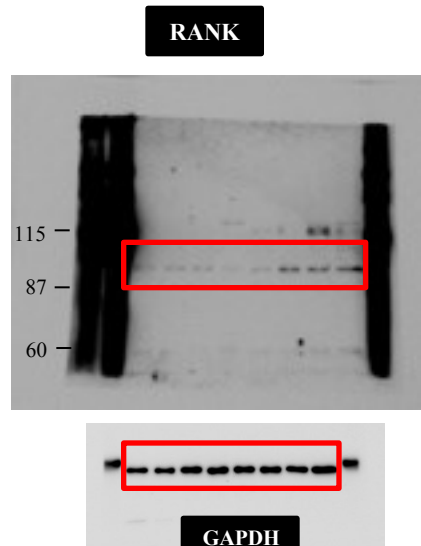

Fig. 5(a)

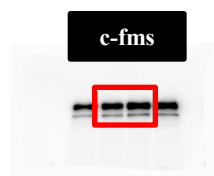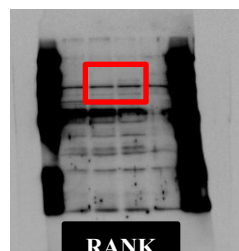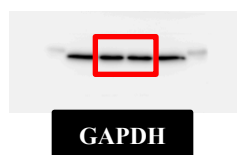

Fig. 7(a)

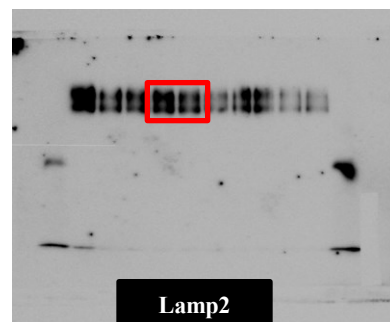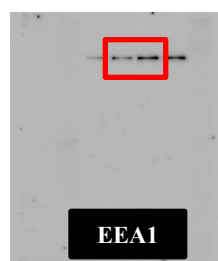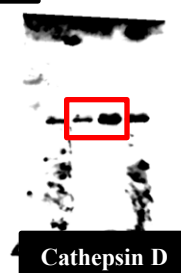

Fig. 5(c)

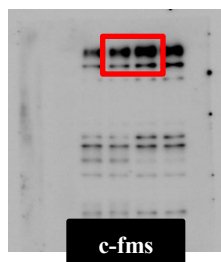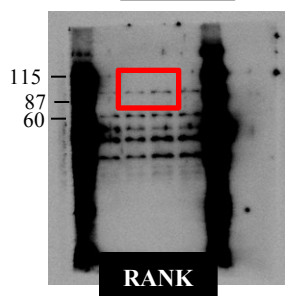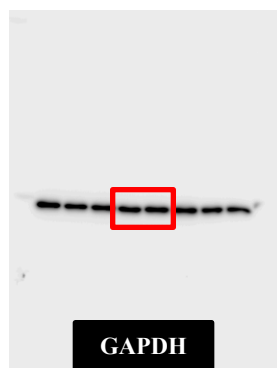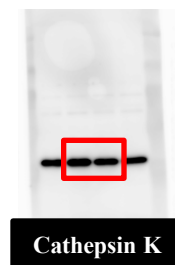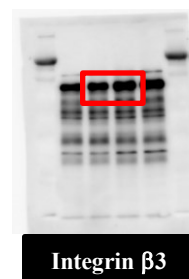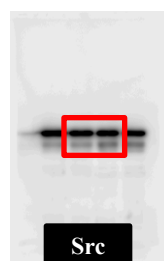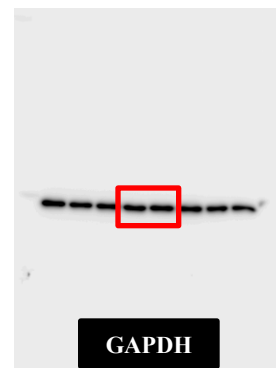

**Supplementary Figure 1.** Up-regulation of Rab27A during osteoclastogenesis. (a) List of up-regulated transcripts in rapid differentiating OCLs compared to slow differentiating OCLs. BMMs were cultured on plastic plate (rapid differentiating conditions) and dentin (slow differentiating conditions) for 72 h in the presence of M-CSF (30ng/mL) and RANKL (50ng/mL). Total RNA from these cells was analyzed by *Affymetrix Microarray* system. (b) Quantitative RT-PCR determination of mRNA expression levels of Rab27A and Rab27B in MC3T3, RAW-D, and RANKL-stimulated RAW-D cells (OCLs). The data are represented as mean  $\pm$  Standard Deviation (S.D.) of values from three independent experiments. \* $P < 0.05$  for the indicated comparisons.

**Supplementary Figure 2** Subcellular localization of GFP-Rab27A expressed RAW-D cells. The cells on glass cover-slips were fixed, permeabilized with 0.2% Tween-20 in PBS, and then allowed to react with (a) anti-GM130 (marker for the Golgi), (b) anti-calnexin (marker for ER), (c) anti-LAMP2 (marker for late endosomes/lysosomes) antibodies on the glass cover slips. After being washed, the samples were incubated with a fluorescence-labeled secondary antibody and then were visualized by confocal laser microscopy. Bar: 10  $\mu$ m
